# Supplementary material for: Nurr1 overexpression in the primary motor cortex alleviates motor dysfunction induced by intracerebral hemorrhage in the striatum in mice
Source: PubMed Central journal article supplement (PMC11305294; doi:10.1016/j.neurot.2024.e00370), 2024-05-03
Supplement: mmc1.pdf [file mmc1.pdf]

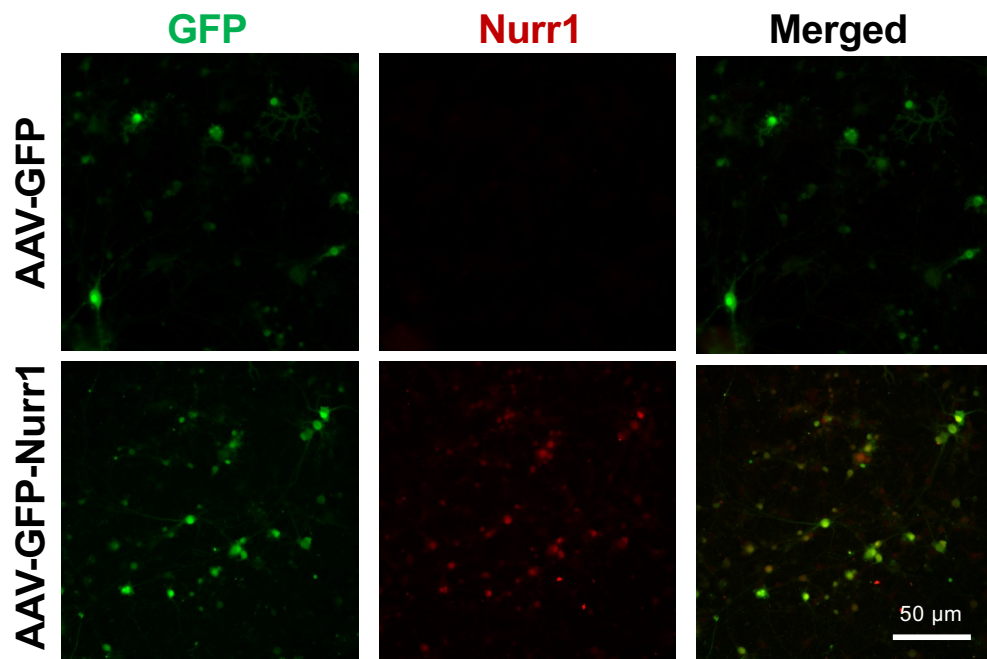

**Supplementary Fig. 1** Confirmation of Nurr1 gene introduction in neuronal cells by AAV vector. Primary cultures of cerebellar cells dissociated from rat embryos were transfected with AAV-GFP or AAV-GFP-Nurr1. GFP fluorescence and Nurr1 immunofluorescence were observed at 14 d after infection of AAVs.

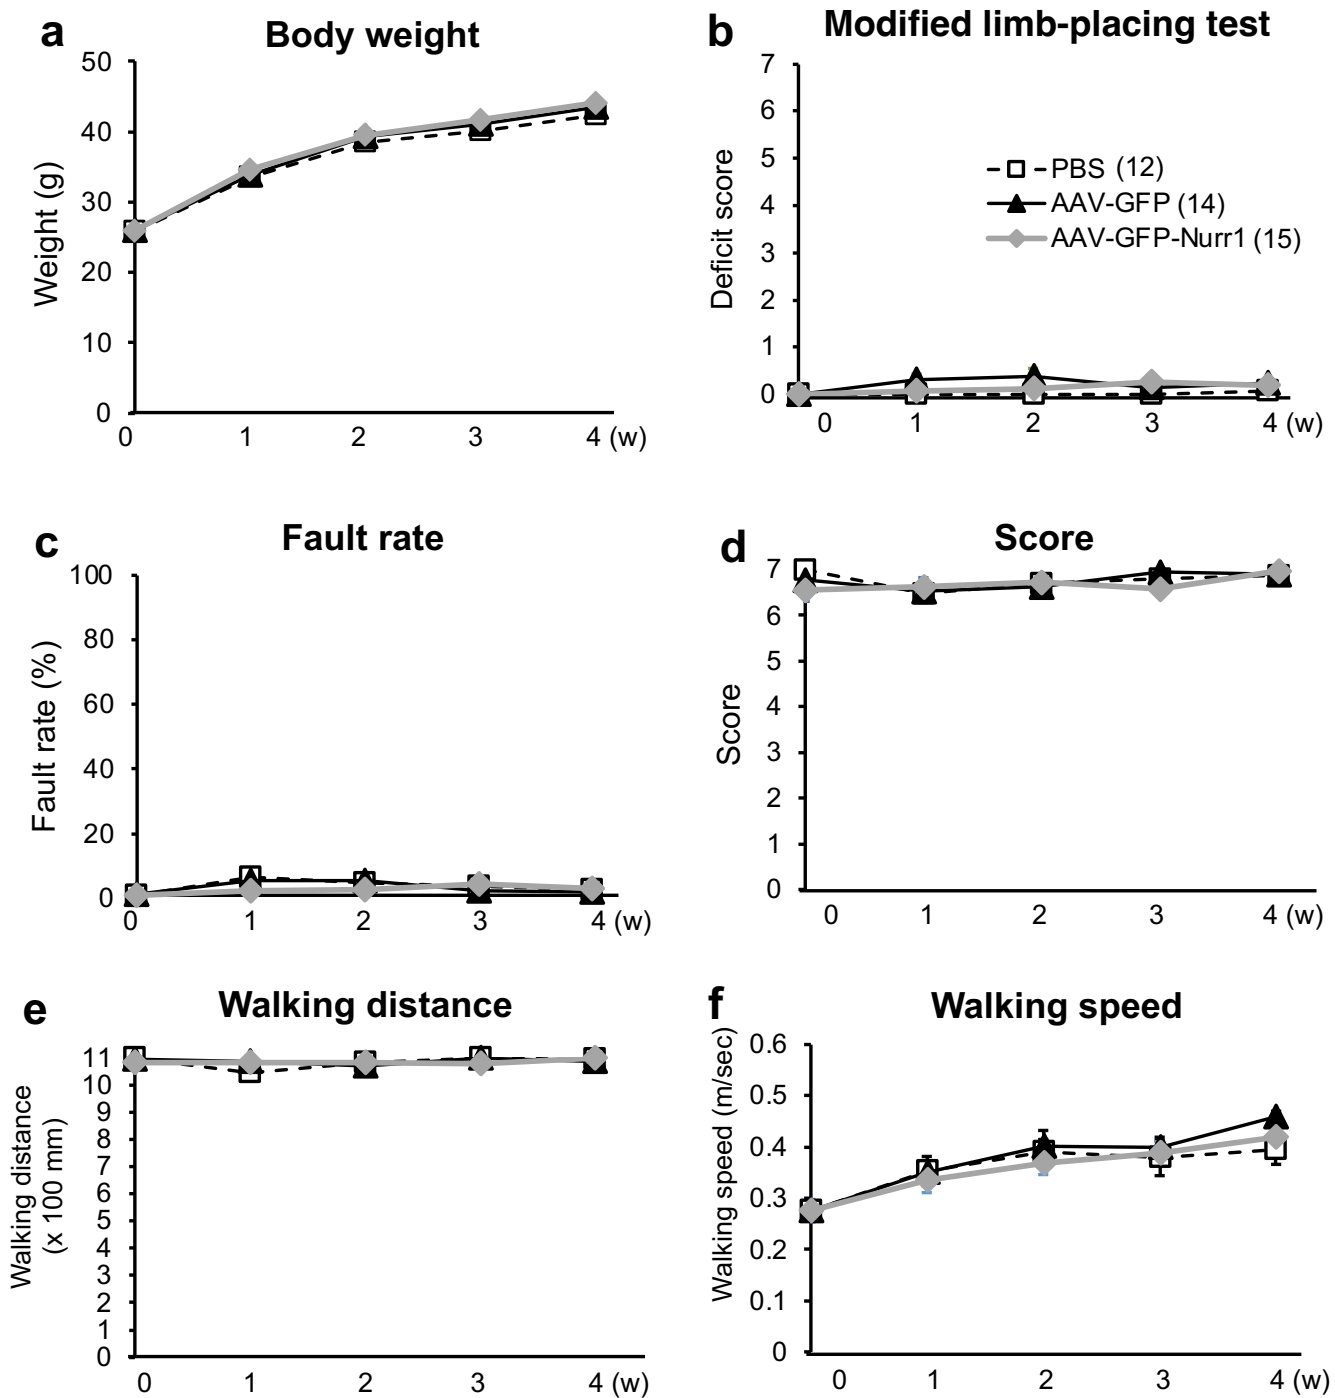

**Supplementary Fig. 2** Body weight and neurological parameters of mice after injection of PBS or AAV vectors into the primary motor cortex. Time-dependent changes in body weight (a), deficit score in the modified limb-placing test (b), fault rate (c), performance score (d), walking distance (e) and walking speed (f) in the beam-walking test were monitored for 4 weeks after injection. No significant differences between groups were observed by two-way repeated measure ANOVA concerning body weight (interactions,  $F_{8,152} = 0.5842$ ,  $P = 0.7898$ ; time,  $F_{4,152} = 921.8$ ,  $P < 0.001$ ; treatment,  $F_{2,38} = 0.8909$ ,  $P = 0.4187$ ), the modified limb-placing test (interactions,  $F_{8,148} = 1.462$ ,  $P = 0.1758$ ; time,  $F_{4,148} = 2.296$ ,  $P = 0.0619$ ; treatment,  $F_{2,37} = 2.929$ ,  $P = 0.0659$ ), the fault rate (interactions,  $F_{8,148} = 3.132$ ,  $P < 0.01$ ; time,  $F_{4,148} = 12.54$ ,  $P < 0.001$ ; treatment,  $F_{2,37} = 1.065$ ,  $P = 0.3551$ ), the performance score (interactions,  $F_{8,148} = 1.177$ ,  $P = 0.3164$ ; time,  $F_{4,148} = 3.054$ ,  $P = 0.0188$ ; treatment,  $F_{2,37} = 0.1724$ ,  $P = 0.8423$ ), the walking distance (interactions,  $F_{8,148} = 1.543$ ,  $P = 0.1472$ ; time,  $F_{4,148} = 2.639$ ,  $P = 0.9066$ ; treatment,  $F_{2,37} = 0.09828$ ,  $P = 0.9066$ ) and the walking speed (interactions,  $F_{8,148} = 0.7803$ ,  $P = 0.6207$ ; time,  $F_{4,148} = 34.09$ ,  $P < 0.001$ ; treatment,  $F_{2,37} = 0.3284$ ,  $P = 0.7222$ ). Number of animals examined was 12 in PBS group, 14 in AAV-GFP group and 15 in AAV-GFP-Nurr1 group, respectively.

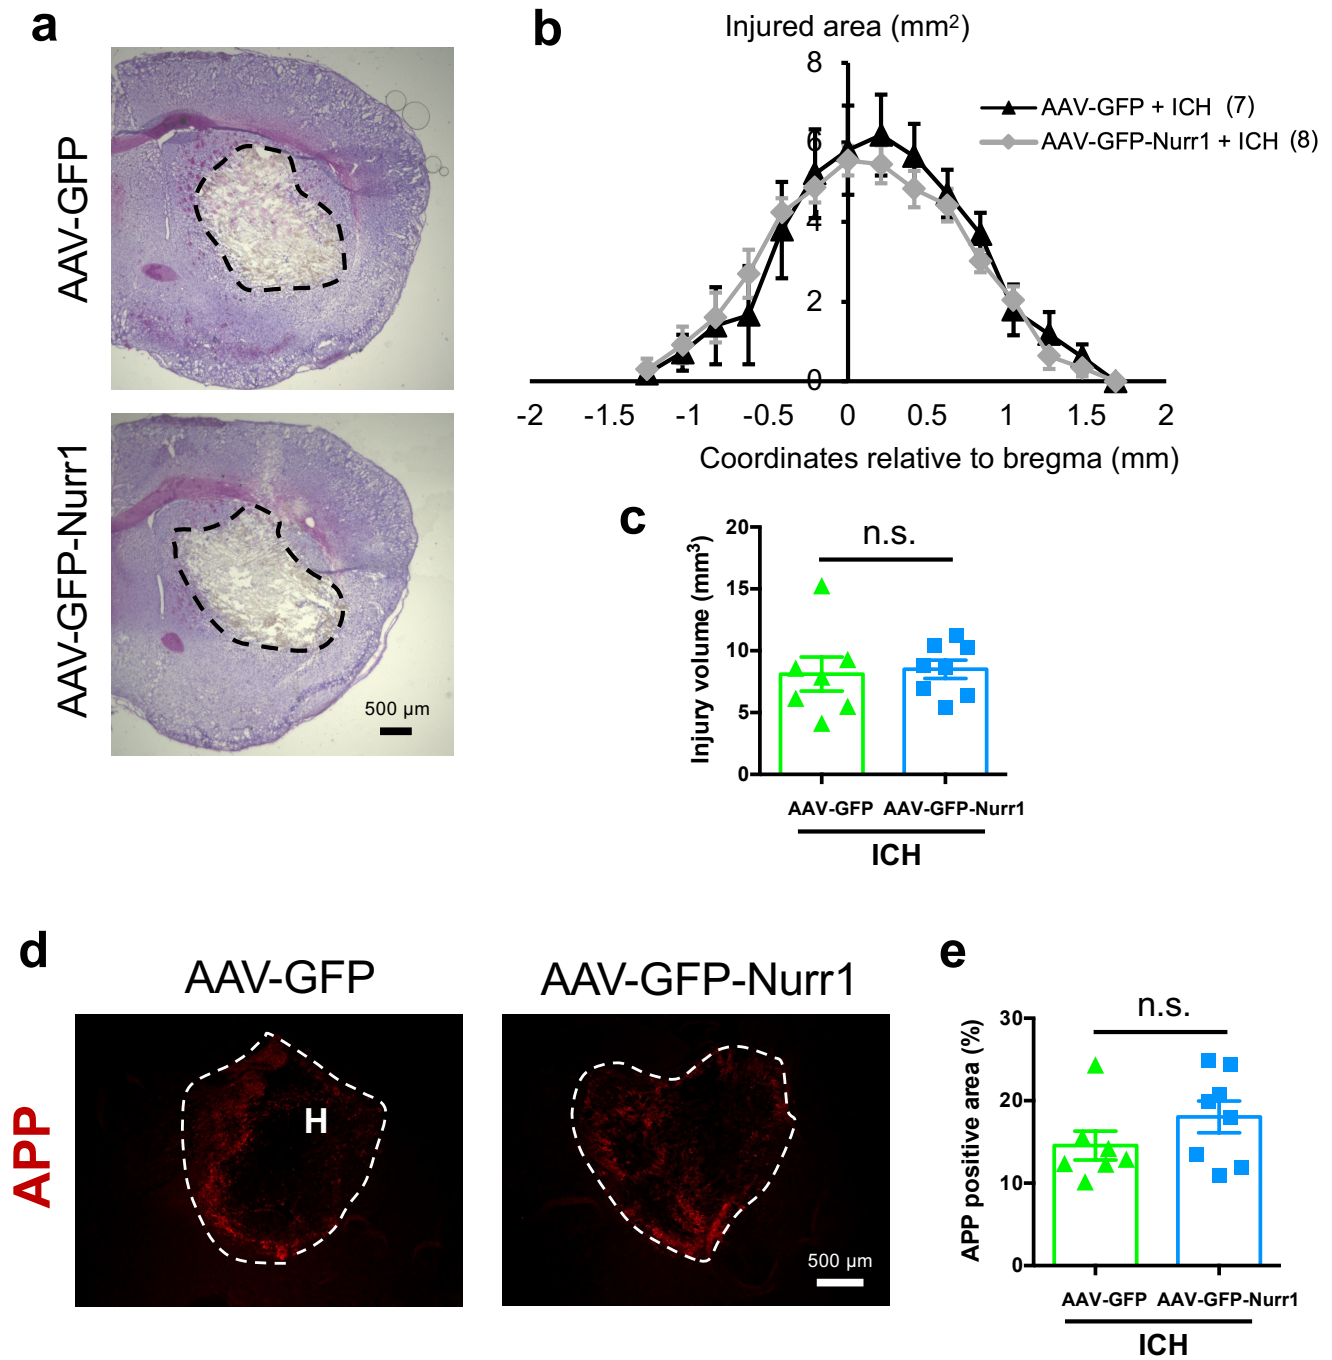

**Supplementary Fig. 3** Effect of Nurr1 overexpression on injury volume and axonal transport after ICH induction. **a** Representative images of Nissl-stained coronal sections obtained at 3 days after ICH. **b-c** Quantitative results of injury area (**b**) and injury volume (**c**) at 3 d after ICH induction. No significant differences between groups were observed by two-way repeated measure ANOVA concerning injury area (interactions,  $F_{14, 182} = 0.5599$ ,  $P = 0.8932$ ; coordinate,  $F_{14, 182} = 40.08$ ,  $P < 0.001$ ; treatment,  $F_{1, 13} = 0.03$ ,  $P = 0.8653$ ). n.s. = not significant. **d** Representative images of amyloid precursor protein (APP) obtained at 3 d after ICH. H; hematoma. **e** Quantitative results of APP-positive area. Number of animals examined was 7 in AAV-GFP + ICH group and 8 in AAV-GFP-Nurr1 + ICH group, respectively.
